# Supplementary material for: Independent replication of a melanoma subtype gene signature and evaluation of its prognostic value and biological correlates in a population cohort
Source: PubMed Central journal article supplement (PMC4484486; doi:10.18632/oncotarget.3549), 2015-03-12
Supplement: oncotarget-06-11683-s001.pdf [file oncotarget-06-11683-s001.pdf]

## Independent replication of a melanoma subtype gene signature and evaluation of its prognostic value and biological correlates in a population cohort

### Supplementary Material

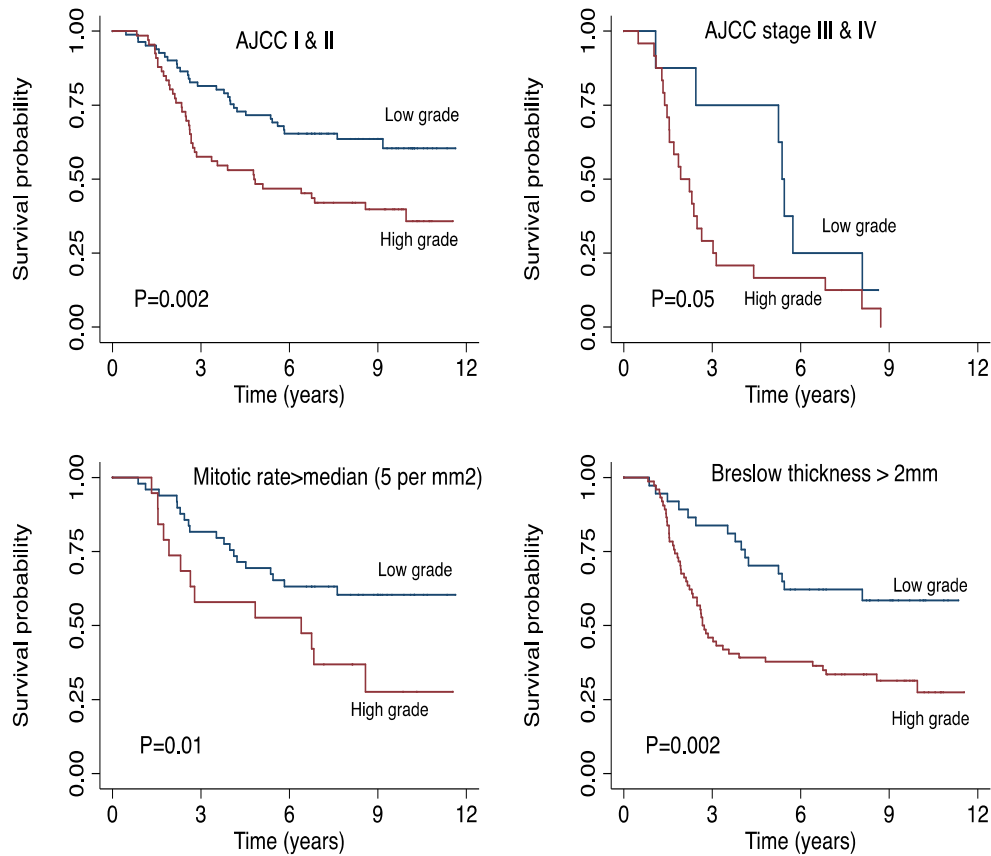

**Supplementary Figure S1:** Melanoma specific survival of all patients (primary and metastatic tumors) in the two datasets as a function of the 2-grade gene signature stratified on AJCC staging, mitotic rate and Breslow thickness.

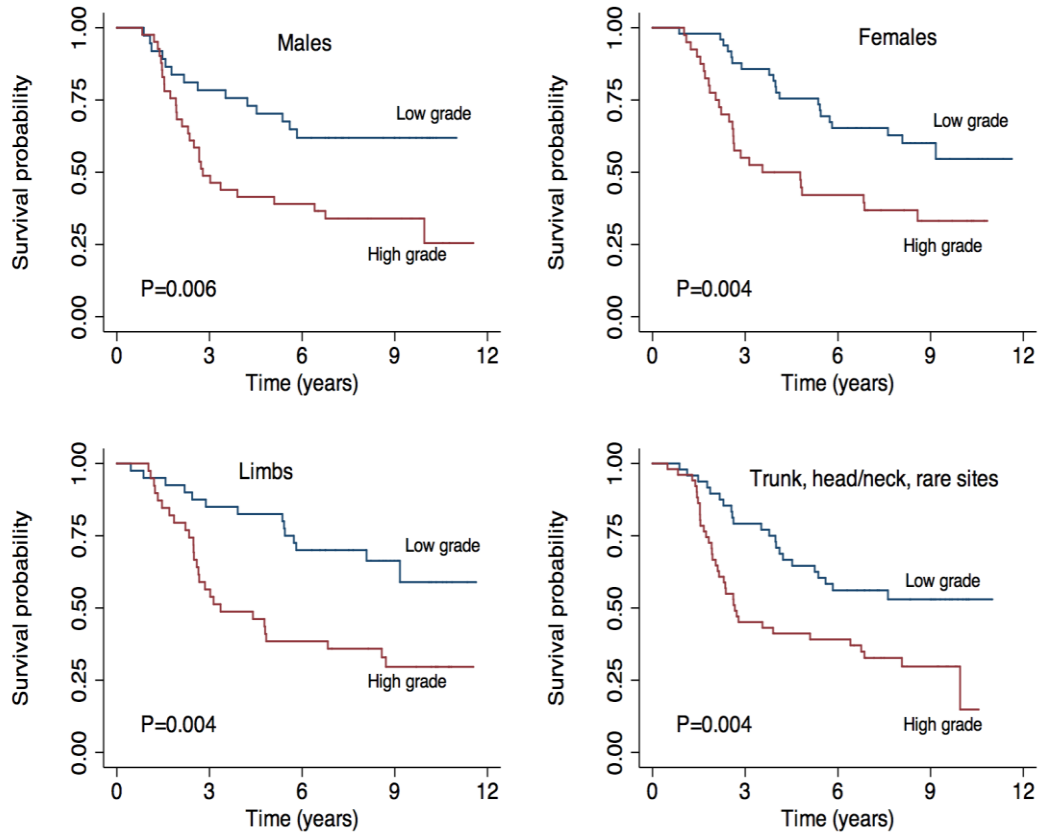

**Supplementary Figure S2:** Melanoma specific survival of all patients (primary and metastatic tumors) in the two datasets as a function of the 2-grade gene signature stratified on sex and primary site.

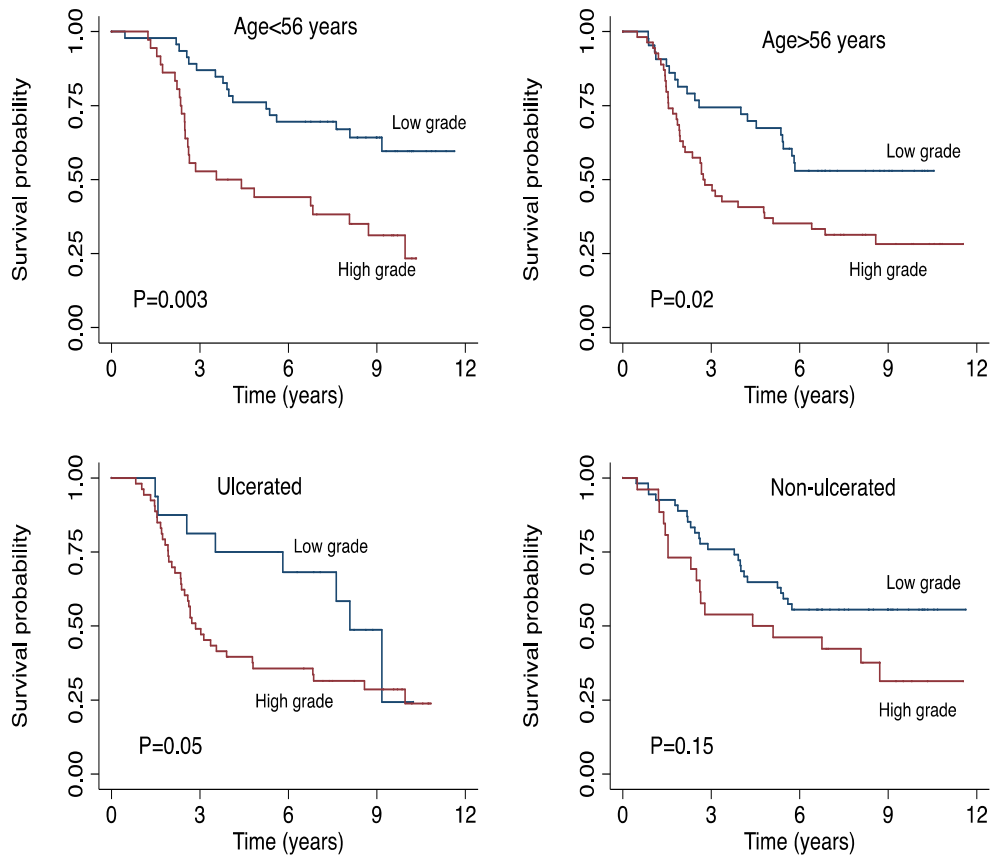

**Supplementary Figure S3:** Melanoma specific survival of all patients (primary and metastatic tumors) in the two datasets in function of the 2-grade gene signature stratified on age at diagnosis and ulceration.

**Supplementary Table S1: Demographical and histological characteristics of the samples from the two datasets**

| Factor                                                 | LMC (N=208)         | Chemotherapy study (N=92) |
|--------------------------------------------------------|---------------------|---------------------------|
| Age, n (%)                                             |                     |                           |
| ≤50years                                               | 65 (31.2)           | 35 (38.5)                 |
| >50 years                                              | 143 (68.8)          | 56 (61.5)                 |
| Gender, n (%)                                          |                     |                           |
| Female                                                 | 106 (51.0)          | 25 (42.4)                 |
| Male                                                   | 102 (49.0)          | 34 (57.6)                 |
| Primary site, n (%)                                    |                     |                           |
| Head/neck                                              | 31 (15.0)           | 7 (16.3)                  |
| Trunk                                                  | 68 (32.8)           | 14 (32.5)                 |
| Limbs                                                  | 93 (44.9)           | 19 (44.2)                 |
| Rare site, sun protected                               | 15 (7.3)            | 3 (7.0)                   |
| Breslow thickness, n (%)                               |                     |                           |
| ≤1mm                                                   | 6 (2.9)             | 9 (14.3)                  |
| 1 - 2mm                                                | 68 (33.0)           | 18 (28.5)                 |
| 2 -4mm                                                 | 74 (35.9)           | 19 (30.2)                 |
| >4mm                                                   | 58 (28.2)           | 17 (27.0)                 |
| Ulceration, n (%)                                      |                     |                           |
| Present                                                | 89 (50.3)           | 23 (44.2)                 |
| Absent                                                 | 88 (49.7)           | 29 (55.8)                 |
| AJCC stage                                             |                     |                           |
| I                                                      | 58 (27.9)           | 3 (3.3)                   |
| II                                                     | 123 (59.1)          | 7 (7.8)                   |
| III                                                    | 25 (12.0)           | 64 (71.1)                 |
| IV                                                     | 2 (1.0)             | 16 (17.8)                 |
| Tumor types, n (%)                                     |                     |                           |
| Primary                                                | 204 (98.1)          | 20 (21.7)                 |
| Metastatic                                             | 4 (1.9)             | 72 (78.3)                 |
| Mitotic rate, n (%)                                    |                     | -                         |
| ≤6 mitoses/mm <sup>2</sup>                             | 112 (53.8)          |                           |
| >6 mitoses/mm <sup>2</sup>                             | 96 (46.2)           |                           |
| Mutation status, n (%)                                 |                     | -                         |
| BRAF                                                   | 90 (48.6)           |                           |
| NRAS                                                   | 42 (22.7)           |                           |
| WT                                                     | 53 (28.7)           |                           |
| Tumor infiltrating lymphocytes (TILS), n (%)           |                     | -                         |
| Absent                                                 | 105 (65.6)          |                           |
| Present                                                | 55 (34.4)           |                           |
| Vascular/lymphatic invasion, n (%):                    |                     | -                         |
| None                                                   | 155 (87.1)          |                           |
| Present                                                | 23 (12.9)           |                           |
| Season-adjusted vitamin D at diagnosis, median (range) | -5.5 (-41.9, 43.6)  | -                         |
| BMI, n (%)                                             |                     | -                         |
| ≤30                                                    | 76 (37.3)           |                           |
| >30                                                    | 128 (62.7)          |                           |
| Sun sensitivity score, median (range)                  | 0.05 (-2.0, 1.8)    | -                         |
| Mole count, median (range)                             | 39 (0, 547)         | -                         |
| Telomere length score, median (range)                  | -0.08 (-0.35, 0.17) | -                         |

**Supplementary Table S2: Sample classification: Mean and range of Pearson correlation coefficient between classified samples and the signature centroid of corresponding class or grade from the training dataset (Swedish cohort)**

| Signature            | Classification | Full dataset (N=300) |             |     | Leeds Melanoma Cohort (N=208) |             |    | Chemotherapy study (N=92) |             |    |
|----------------------|----------------|----------------------|-------------|-----|-------------------------------|-------------|----|---------------------------|-------------|----|
|                      |                | Mean                 | Range       | N   | Mean                          | Range       | N  | Mean                      | Range       | N  |
| 4-class <sup>a</sup> | High immune    | 0.37                 | 0.12 -0.74  | 70  | 0.39                          | 0.12 – 0.74 | 44 | 0.34                      | 0.13 0.74   | 26 |
|                      | Normal-like    | 0.43                 | 0.11 -0.70  | 75  | 0.43                          | 0.11 -0.70  | 69 | 0.39                      | 0.11 – 0.29 | 6  |
|                      | Pigmentation   | 0.32                 | 0.10 – 0.62 | 106 | 0.34                          | 0.12 – 0.62 | 69 | 0.29                      | 0.10 – 0.42 | 37 |
|                      | Proliferation  | 0.32                 | 0.14 – 0.62 | 37  | 0.29                          | 0.14 – 0.60 | 17 | 0.35                      | 0.17 – 0.62 | 20 |
|                      | Unclassified   | 0.08                 | 0.03 - 0.10 | 12  | 0.07                          | 0.03 -0.10  | 9  | 0.08                      | 0.08 - 0.09 | 3  |
| 2-grade              | Low grade      | 0.34                 | 0.10 – 0.70 | 108 | 0.34                          | 0.10 – 0.70 | 88 | 0.32                      | 0.11 – 0.64 | 20 |
|                      | High grade     | 0.29                 | 0.10 – 0.59 | 135 | 0.30                          | 0.10 – 0.59 | 82 | 0.29                      | 0.10 – 0.46 | 53 |
|                      | Unclassified   | 0.05                 | 0.00 – 0.10 | 57  | 0.06                          | 0.00 – 0.10 | 38 | 0.04                      | 0.01 – 0.10 | 19 |

a: 55 patients (49 from Leeds Meloma Cohort and 6 from Chemotherapy study) were classified in both High immune and Normal-like while 71 patients (41 from LMC and 30 from Chemotherapy study) were classified in both Pigmentation and Proliferation classes. This large overlap was equally observed in the Swedish cohort and prompted the derivation of the two grade signature with mutually exclusive high and low grades.

**Supplementary Table S3: Tumor characteristics in sample groups defined by the four-classes and the two-grade signatures in combined Leeds melanoma cohort and Chemotherapy study**

| Factor                           | Molecular class       |                       |                         |                       |                        |                       | Molecular grade      |                       |                        |                       |
|----------------------------------|-----------------------|-----------------------|-------------------------|-----------------------|------------------------|-----------------------|----------------------|-----------------------|------------------------|-----------------------|
|                                  | High immune<br>(N=70) | Normal-like<br>(N=75) | Pigmentation<br>(N=106) | Proliferative<br>(37) | Unclassified<br>(N=12) | P <sup>a</sup>        | Low grade<br>(N=108) | High grade<br>(N=135) | Unclassified<br>(N=57) | P <sup>a</sup>        |
| Sex (Male %)                     | 57.1                  | 41.9                  | 51.6                    | 57.7                  | 54.6                   | 0.27                  | 46.6                 | 50.0                  | 63.3                   | 0.62                  |
| Site (limbs %)                   | 48.9                  | 39.7                  | 34.6                    | 17.6                  | 33.3                   | 0.12                  | 46.8                 | 43.1                  | 44.7                   | 0.60                  |
| Ulceration (%)                   | 32.4                  | 32.6                  | 66.2                    | 84.6                  | 57.1                   | $5.8 \times 10^{-6}$  | 27.5                 | 62.1                  | 56.5                   | $3.2 \times 10^{-6}$  |
| Vascular invasion (%)            | 4.3                   | 5.3                   | 10.4                    | 5.4                   | 25.0                   | 0.45                  | 7.5                  | 13.7                  | 22.6                   | 0.29                  |
| Tumor type (%)                   |                       |                       |                         |                       |                        |                       |                      |                       |                        |                       |
| Primary                          | 67.1                  | 97.3                  | 73.6                    | 46.0                  | 75.0                   | $2.1 \times 10^{-8}$  | 86.1                 | 67.4                  | 70.2                   | $7.3 \times 10^{-4}$  |
| Metastatic                       | 32.9                  | 2.7                   | 26.4                    | 54.0                  | 25.0                   |                       | 13.9                 | 32.6                  | 29.8                   |                       |
| AJCC stage (%)                   |                       |                       |                         |                       |                        |                       |                      |                       |                        |                       |
| I                                | 28.6                  | 41.3                  | 8.6                     | 0.00                  | 8.3                    | $2.6 \times 10^{-11}$ | 42.6                 | 4.5                   | 16.1                   | $2.2 \times 10^{-12}$ |
| II                               | 30.0                  | 48.0                  | 50.5                    | 33.3                  | 66.7                   |                       | 36.1                 | 48.5                  | 46.4                   |                       |
| III/IV                           | 41.3                  | 10.7                  | 40.9                    | 66.7                  | 25.0                   |                       | 21.3                 | 47.0                  | 37.5                   |                       |
| Age diagnosis<br>(Median, range) | 54.4<br>(20.0, 85.4)  | 55.3<br>(24.6 – 74.9) | 56.8<br>(25.5, 90.7)    | 61.3<br>(27.5, 81.4)  | 57.4<br>(27.3, 76.3)   | 0.10                  | 55.6<br>(20.0, 85.4) | 58.7<br>(25.5, 90.7)  | 52.2<br>(24.6, 78.3)   | 0.06                  |
| Breslow<br>(Median, range)       | 2.0<br>(0.8, 14)      | 2.0<br>(0.8, 8.5)     | 3.5<br>(0.3, 15.3)      | 4.1<br>(0.8, 15.0)    | 2.7<br>(1.9, 6.0)      | $1.4 \times 10^{-6}$  | 1.9<br>(0.8, 9.0)    | 3.6<br>(0.3, 15.3)    | 2.6<br>(0.8, 12.0)     | $2.6 \times 10^{-7}$  |

a: Test ignoring the unclassified samples.
